# Supplementary material for: Reconstitution of human PDAC using primary cells reveals oncogenic transcriptomic features at tumor onset
Source: PubMed Central journal article supplement (PMC10821902; doi:10.1038/s41467-024-45097-2), 2024-01-27
Supplement: 41467_2024_45097_MOESM3_ESM.pdf [file 41467_2024_45097_MOESM3_ESM.pdf]

### **Description of Additional Supplementary Files**

**Supplementary Data 1.** Organ donor information of the primary tissues used in this study.

**Supplementary Data 2.** Six subgroups of DEGs described in Figure 1d and their expression (normalized and transformed using DESeq2 1.36.0).

**Supplementary Data 3.** List of genes described in Figure 3d and their log<sub>2</sub> normalized counts.

**Supplementary Data 4.** List of genes described in Figure S3d and their log<sub>2</sub> fold change.

**Supplementary Data 5.** Result tables of differential expression analysis from acinar-KPTS vs acinar-KRAS cells (Figure S4a), and ductal-KPTS vs fresh ductal (Figure S4b), respectively. DEGs were identified by negative binomial Wald test using DESeq2 1.36.0 in R software with fold change > 2 and adjusted p-value < 0.05.

**Supplementary Data 6.** List of genes described in Figure 6a-c, including 140 genes significantly highly expressed in acinar-KPTS cells (compared with fresh and metaplastic cells), 696 genes significantly highly expressed in ductal-KPTS cells (compared with fresh and metaplastic cells), and 2805 genes significantly highly expressed in TCGA PDAC samples (compared with GTEx normal pancreas).
